# Supplementary material for: Expanding the chemical space using a chemical reaction knowledge graph
Source: Royal Society of Chemistry journal article supplement (doi:10.1039/d3dd00230f), 2024-01-01
Supplement: d3dd00230f1.pdf [file d3dd00230f1.pdf]

# Expanding the chemical space using a Chemical Reaction Knowledge Graph

## Supplementary information

Table S1. Search space for the hyperparameter optimization.

| Hyperparameter   | Range / Set                                     |
|------------------|-------------------------------------------------|
| Number of Hops   | {1, 2}                                          |
| Sortpool k       | [1, 1000]                                       |
| Hidden Channels  | {4, 8, 16, 32, 64, 128, 256, 512}               |
| Number of Layers | [1, 12]                                         |
| Learning Rate    | {0.00001, 0.00005, 0.0001, 0.0005, 0.001, 0.01} |
| Dropout          | [0.0, 0.99]                                     |
| Decay            | [0.0, 0.99]                                     |

Table S2. Result from the three rounds of the hyperparameter optimization.

| Hyperparameter            | Optimal Value |
|---------------------------|---------------|
| Validation AUC            | 0.89          |
| Decay                     | 0.85          |
| Dropout                   | 0.52          |
| Number of Hidden channels | 128           |
| Learning rate             | 0.0005        |
| Number of Hops            | 1             |
| Number of Layers          | 6             |
| Sortpool k                | 879           |
